# Supplementary material for: A Comprehensive Study of the Use of Cu(I)/4,4’-Dicarboxy-2,2’-biquinoline Complexes to Measure the Total Reducing Capacity: Application in Herbal Extracts
Source: MDPI journal article supplement (doi:10.3390/molecules201219855), 2015-12-14
Supplement: s1 [file s1]

# Supplementary Materials: A Comprehensive Study of the Use of the Cu(I)/4,4'-Dicarboxy-2,2'-biquinoline Complexes to Measure the Total Reducing Capacity: Application in Herbal Extracts

Hariane R. Manoel and Horacio D. Moya

## Reagents and solutions

Disodium salt of 4,4'-dicarboxy-2,2'-biquinoline ( $\text{Na}_2\text{BCA}$ , > 98%, FW 388.3  $\text{g}\cdot\text{mol}^{-1}$ , Sigma-Aldrich, São Paulo, Brazil)  $3.0 \times 10^{-2}$  M solution, was prepared by dissolving 0.5825 g in a 50 mL volumetric flask.

Copper(II) perchlorate,  $\text{Cu}(\text{ClO}_4)_2$ , 2.328 M solution was synthesized and standardized as described in previous studies [10]. A  $1.0 \times 10^{-2}$  M diluted solution used was prepared accurately.

Ammonium acetate ( $\text{NH}_4(\text{H}_3\text{C}-\text{COO})$ , 98%, FW 77.08  $\text{g}\cdot\text{mol}^{-1}$ , Sigma-Aldrich) 2.0 M solution, was prepared by dissolving 77.08 g in a 500 mL volumetric flask and used as pH 7.0 buffer solution.

Ascorbic acid (AA,  $\text{C}_6\text{H}_8\text{O}_6$ , 99%, FW 176.12  $\text{g}\cdot\text{mol}^{-1}$ , Sigma-Aldrich)  $1.0 \times 10^{-3}$  M (0.177  $\text{mg}\cdot\text{mL}^{-1}$ ) standard solution was prepared daily by dissolving 0.1761 g in a 100 mL volumetric flask.

Tannic acid ( $\text{C}_76\text{H}_{52}\text{O}_{46}$ , 99%, FW 1701.2  $\text{g}\cdot\text{mol}^{-1}$ ), gallic acid ( $\text{C}_7\text{H}_6\text{O}_5$ , 98%, FW 170.12  $\text{g}\cdot\text{mol}^{-1}$ ), phloroglucinol ( $\text{C}_6\text{H}_6\text{O}_3$ , 99%, FW 126.1  $\text{g}\cdot\text{mol}^{-1}$ ), pyrogalllic acid ( $\text{C}_6\text{H}_6\text{O}_3$ , 99%, FW 126.1  $\text{g}\cdot\text{mol}^{-1}$ ), 1,2,4-benzenetriol ( $\text{C}_6\text{H}_6\text{O}_3$ , 99%, FW 126.1  $\text{g}\cdot\text{mol}^{-1}$ ), pyrocatechol ( $\text{C}_6\text{H}_6\text{O}_2$ ,  $\geq 99\%$ , FW 110.1  $\text{g}\cdot\text{mol}^{-1}$ ), hydroquinone ( $\text{C}_6\text{H}_6\text{O}_2$ ,  $\geq 99\%$ , FW 110.1  $\text{g}\cdot\text{mol}^{-1}$ ), resorcinol ( $\text{C}_6\text{H}_6\text{O}_2$ ,  $\geq 99\%$ , FW 110.1  $\text{g}\cdot\text{mol}^{-1}$ ) and phenol ( $\text{C}_6\text{H}_6\text{O}$ ,  $\geq 99\%$ , FW 94.11  $\text{g}\cdot\text{mol}^{-1}$ )  $1.0 \times 10^{-4}$  to  $5.3 \times 10^{-2}$  M stock solutions (all from Labsynth, São Paulo, Brazil) were prepared by dissolution in water.

(-)-Epigallocatechingallate ( $\text{C}_{22}\text{H}_{18}\text{O}_{11}$ ,  $\geq 98\%$ , FW 458.4  $\text{g}\cdot\text{mol}^{-1}$ ), sinapic acid ( $\text{C}_{11}\text{H}_{12}\text{O}_5$ ,  $\geq 98\%$ , FW 224.21  $\text{g}\cdot\text{mol}^{-1}$ ), 2,3,4-THB (2,3,4-trihydroxybenzoic acid,  $\text{C}_7\text{H}_6\text{O}_4$ , 97%, FW 170.12  $\text{g}\cdot\text{mol}^{-1}$ ), vanillin ( $\text{C}_8\text{H}_8\text{O}_3$ , 99%, FW 152.2  $\text{g}\cdot\text{mol}^{-1}$ ), vanillic acid ( $\text{C}_8\text{H}_8\text{O}_4$ , > 97%, FW 168.15  $\text{g}\cdot\text{mol}^{-1}$ ) and 4-hydroxyphenylacetic acid ( $\text{HO}\text{C}_6\text{H}_4\text{CH}_2\text{CO}_2\text{H}$ , 98%, FW 152.15  $\text{g}\cdot\text{mol}^{-1}$ )  $1.0 \times 10^{-4}$  to  $1.0 \times 10^{-3}$  M stock solutions (all from Sigma-Aldrich) were prepared by dissolution in water.

Caffeic acid ( $\text{C}_9\text{H}_8\text{O}_4$ , > 98%, FW 180.2  $\text{g}\cdot\text{mol}^{-1}$ , Sigma-Aldrich) and ferulic acid ( $\text{C}_{10}\text{H}_{10}\text{O}_4$ , 99%, FW 194.2  $\text{g}\cdot\text{mol}^{-1}$ , Sigma-Aldrich)  $1.0 \times 10^{-3}$  M stock solutions were prepared in water with addition of six drops of 0.20 M NaOH solution.

*p*-coumaric acid ( $\text{C}_9\text{H}_8\text{O}_3$ ,  $\geq 98\%$ , FW 164.2  $\text{g}\cdot\text{mol}^{-1}$ , Sigma-Aldrich)  $1.0 \times 10^{-3}$  M stock solution was prepared in water with addition of two drops of 0.20 M NaOH solution.

Quercetin ( $\text{C}_{15}\text{H}_{10}\text{O}_7$ , 98 % HPLC, FW 302.2  $\text{g}\cdot\text{mol}^{-1}$ , Sigma-Aldrich, São Paulo, Brazil)  $1.0 \times 10^{-3}$  M stock solution was prepared by dissolving 0.03283 g in 50:50 *v/v* ethanol:water. A  $1.0 \times 10^{-4}$  M solution was obtained by diluting in water with addition of one drop of 0.20 M NaOH solution.

Rutin ( $\text{C}_{27}\text{H}_{30}\text{O}_{16}$ , 95% HPLC, FW 610.5  $\text{g}\cdot\text{mol}^{-1}$ , Sigma-Aldrich)  $1.0 \times 10^{-3}$  M stock solution, was prepared by dissolving 0,0665 g in 30 mL ethanol ( $\text{CH}_3\text{CH}_2\text{OH}$ , 99.6%, FW 46.07  $\text{g}\cdot\text{mol}^{-1}$ ,  $d = 0.789$   $\text{g}\cdot\text{cm}^{-3}$ , Synth, São Paulo, Brazil), adding five drops 0.20 M NaOH solution and completing the volume with water. A  $1.0 \times 10^{-4}$  M solution was prepared by accurate dilution in water.

Trolox ( $\text{C}_{14}\text{H}_{18}\text{O}_4$ , 97 %, FW 250.29  $\text{g}\cdot\text{mol}^{-1}$ , Sigma-Aldrich)  $4.0 \times 10^{-4}$  M stock solution was prepared by mixing 8.0 mL ethanol ( $\text{CH}_3\text{CH}_2\text{OH}$ , 99.6%, FW 46.07  $\text{g}\cdot\text{mol}^{-1}$ ,  $d = 0.789$   $\text{g}\cdot\text{cm}^{-3}$ , Synth) and 0.20 mL NaOH 0.20 M in a 100.0 mL volumetric flask. The solution remained in the ultrasound bath for 10 min and then the volume was completed with water.

$\beta$ -carotene ( $\text{C}_{40}\text{H}_{56}$ ,  $\leq 95\%$ , FW 536.87  $\text{g}\cdot\text{mol}^{-1}$ , Sigma-Aldrich)  $1.0 \times 10^{-3}$  M stock solution was prepared by dissolving 0.0272 g in 40:10 (*v/v*) acetone:water in a 50 mL volumetric flask.

The Folin-Ciocalteu reagent was prepared as described in Brazilian Pharmacopoeia [15] as follow: 20 g of sodium tungstate ( $\text{Na}_2\text{WO}_4\cdot 2\text{H}_2\text{O}$ ,  $\geq 99\%$ , FW 329.85  $\text{g}\cdot\text{mol}^{-1}$ , Vetec, Rio de Janeiro Brazil, 4.0 g of phosphomolybdic acid ( $\text{H}_3\text{Mo}_{12}\text{O}_{40}\text{P}\cdot\text{H}_2\text{O}$ ,  $\geq 99.9\%$ , FW 1825.25  $\text{g}\cdot\text{mol}^{-1}$ , Sigma-Aldrich), and 10 mL of phosphoric acid ( $\text{H}_3\text{PO}_4$ , 85%, FW 98.00  $\text{g}\cdot\text{mol}^{-1}$ , Merck, São Paulo, Brazil) were dissolved

in 150 mL of water. This solution was heated under reflux for 2 h and after cooling at room temperature it was diluted with water to 200 mL.

Sodium carbonate ( $\text{Na}_2\text{CO}_3$ ,  $\geq 99\%$ , FW 105.99  $\text{g}\cdot\text{mol}^{-1}$ , Vetec, Rio de Janeiro, Brazil) 10% (*m/v*) solution was prepared in water.

A 50% (*v/v*) methyl alcohol ( $\text{CH}_3\text{COH}$ , 99.8%, FW 32.04  $\text{g}\cdot\text{mol}^{-1}$ ,  $d = 0.792\text{ g}\cdot\text{cm}^{-3}$ , Merck) and a 70% (*v/v*) acetone ( $\text{CH}_3\text{OCH}_3$ ,  $\geq 99.5\%$ , FW 58.08  $\text{g}\cdot\text{mol}^{-1}$ ,  $d = 0.79\text{ g}\cdot\text{cm}^{-3}$ , Merck) solutions were prepared in water.

A 0.0237  $\text{mg}\cdot\text{mL}^{-1}$  DPPH (2,2-diphenyl-1-picrylhydrazyl,  $\text{C}_{18}\text{H}_{12}\text{N}_5\text{O}_6$ , FW 394.32  $\text{g}\cdot\text{mol}^{-1}$ , Sigma-Aldrich) solution was prepared daily by dissolving 2.4 mg in methyl alcohol ( $\text{CH}_3\text{COH}$ , 99.8%, FW 32.04  $\text{g}\cdot\text{mol}^{-1}$ ,  $d = 0.792\text{ g}\cdot\text{cm}^{-3}$ , Merck) in a 100.0 mL volumetric flask.

### **Preparation of Aqueous Extracts of Medicinal Plants According the Brazilian Pharmacopoeia**

0.75 g of dry material (leaf, branch or root) of any plant was transferred to a 250 mL erlenmeyer containing 150 mL of water and after homogenization it was maintained on a water bath (80–90 °C; 30 min). After cooling, the mixture was transferred to a 250 mL volumetric flask which was completed with water. After the plant material decanted the solution was filtered through filter paper discarding the first 50 mL. Next 5.0 mL of the filtrate above were transferred to a 25 mL volumetric flask which was completed with water and then used in measurements [23].

### **Preparation of Samples Extracts for Determining the Reduction Capacity with DPPH**

Dry plant material (1.00 g) was transferred to a 100 mL beaker which was added 40 mL of a 50% (*v/v*) methyl alcohol aqueous solution. After mixing the mixture was allowed to stand (25 °C; 1 h). This mixture was then centrifuged (15 min; 15000 rpm) and the supernatant was transferred to a 100 mL volumetric flask. Next, 40 mL of a 70% (*v/v*) acetone aqueous solution were added in the centrifuged. After homogenization the mixture was also allowed to stand (25 °C; 1 h). Then, this new mixture was centrifuged (15 min; 15000 rpm) and the supernatant obtained was transferred to the same 100 mL volumetric flask. Water was added to complete the volume [11,15,16].

### **Total Polyphenol Content Quantification with the FC Reagent**

The procedure for quantifying the total polyphenol content described in the Brazilian Pharmacopoeia was slightly modified using the 10-fold reduction in the amount of all reagents [23]. So, 5.0 mL of the filtrate (see *Preparation of aqueous extracts of medicinal plants*) were transferred to a 25 mL volumetric flask and completed with water.

Firstly, a calibration curve was raised by mixing aliquots of 100 to 800  $\mu\text{L}$  of a  $1.0 \times 10^{-4}$  M pyrogallol acid (PA) standard solution with 200  $\mu\text{L}$  of FC reagent and completed with a 10%  $\text{Na}_2\text{CO}_3$  solution in a 5.0 mL volumetric flask.

The multiple standard addition method was used for quantification of all samples transferring 100–500  $\mu\text{L}$  of aqueous extracts (depending of the species) to five 5.0 mL volumetric flasks and then added 200  $\mu\text{L}$  of FC reagent. In four out of five volumetric flasks were added aliquots 150, 200, 250 and 300  $\mu\text{L}$  of  $1.0 \times 10^{-4}$  M PA solution and the flasks completed with 10%  $\text{Na}_2\text{CO}_3$  solution.

In both curves (calibration and multiple standard additions) the absorbance was measured at 715 nm ( $A_{715\text{nm}}$ ) after 30 min using water as reference solution.
